# Supplementary material for: Rapid identification of bacterial mixtures in urine using MALDI-TOF MS-based algorithm profiling coupled with magnetic enrichment
Source: Royal Society of Chemistry journal article supplement (doi:10.1039/d1an02098f), 2021-12-10
Supplement: d1an02098f1.pdf [file d1an02098f1.pdf]

## Rapid identification of bacterial mixtures in urine using MALDI-TOF MS-based algorithm profiling coupled with magnetic enrichment

Wenmin Cheng<sup>a</sup>, Haimei Shi<sup>a</sup>, Mengjing Teng<sup>b</sup>, Menghuan Yu<sup>a</sup>, Bin Feng<sup>a,\*</sup>, Chuanfan Ding<sup>a</sup>, Shaoning Yu<sup>a</sup> and Fan Yang<sup>b,\*</sup>

**a**, Zhejiang Provincial Key Laboratory of Advanced Mass Spectrometry and Molecular Analysis, Institute of Mass Spectrometry, School of Material Science and Chemical Engineering, Ningbo University, Ningbo, Zhejiang 315211, China.

**b**, Kweichow Moutai Group, Renhuai, Guizhou, 564501, China.

\*Corresponding to: fengbin@nbu.edu.cn (for B.F.), yangfanmt@189.cn (for F.Y.)

### Table of contents:

**Fig. S1.** Photograph of Fc-MBL@Fe<sub>3</sub>O<sub>4</sub> enrichment efficiency for select bacteria in urine. (a) *E. coli*, (b) *S. aureus*, (c) *K. pneumoniae*, and (d) *P. aeruginosa*.

**Fig. S2.** Photograph of Fc-MBL@Fe<sub>3</sub>O<sub>4</sub> enrichment efficiency for select bacteria in aqueous solution. (a) *E. coli*, (b) *S. aureus*, (c) *K. pneumoniae*, and (d) *P. aeruginosa*.

**Fig. S3.** MALDI-TOF MS of a single bacterial strain enriched by Fc-MBL@Fe<sub>3</sub>O<sub>4</sub> from urine. (a) *S. aureus*, (b) *P. aeruginosa*, and (c) *K. pneumoniae*.

**Fig. S4.** MALDI-TOF MS identification of a urine sample from a healthy person.

**Fig. S5.** MALDI-TOF MS identification of a bacteriuria sample without bacterial enrichment.

**Fig. S6.** MALDI-TOF MS of a bacterial mixture enriched by centrifugation in aqueous solution. (a) 50% *E. coli* with 50% *P. aeruginosa*, (b) 50% *E. coli* with 50% *K. pneumoniae*, (c) 50% *S. aureus* with 50% *P. aeruginosa*, (d) 50% *S. aureus* with 50% *K. pneumoniae*, (e) 50% *P. aeruginosa* with 50% *K. pneumoniae*.

**Fig. S7.** MALDI-TOF MS of a bacterial mixture enriched by Fc-MBL@Fe<sub>3</sub>O<sub>4</sub> in aqueous solution. (a) 50% *E. coli* with 50% *P. aeruginosa*, (b) 50% *E. coli* with 50% *K. pneumoniae*, (c) 50% *S. aureus* with 50% *P. aeruginosa*, (d) 50% *S. aureus* with 50% *K. pneumoniae*, (e) 50% *P. aeruginosa* with 50% *K. pneumoniae*.

**Fig. S8.** MALDI-TOF MS of a bacterial mixture enriched by centrifugation in aqueous solution. (a) 67% *E. coli* with 33% *S. aureus*, (b) 67% *E. coli* with 33% *P. aeruginosa*, (c) 67% *E. coli* with 33% *K. pneumoniae*, (d) 67% *S. aureus* with 33% *P. aeruginosa*, (e) 67% *S. aureus* with 33% *K. pneumoniae*, (f) 67% *P. aeruginosa* with 33% *K. pneumoniae*.

**Fig. S9.** MALDI-TOF MS of a bacterial mixture enriched by Fc-MBL@Fe<sub>3</sub>O<sub>4</sub> in aqueous solution. (a) 67% *E. coli* with 33% *S. aureus*, (b) 67% *E. coli* with 33% *P. aeruginosa*, (c) 67% *E. coli* with

33% *K. pneumoniae*, (d) 67% *S. aureus* with 33% *P. aeruginosa*, (e) 67% *S. aureus* with 33% *K. pneumoniae*, (f) 67% *P. aeruginosa* with 33% *K. pneumoniae*.

**Fig. S10.** MALDI-TOF MS of a bacterial mixture enriched by centrifugation in urine. (a) 50% *E. coli* with 50% *P. aeruginosa*, (b) 50% *E. coli* with 50% *K. pneumoniae*, (c) 50% *S. aureus* with 50% *P. aeruginosa*, (d) 50% *S. aureus* with 50% *K. pneumoniae*, (e) 50% *P. aeruginosa* with 50% *K. pneumoniae*.

**Fig. S11.** MALDI-TOF MS of a bacterial mixture enriched by Fc-MBL@Fe<sub>3</sub>O<sub>4</sub> in urine. (a) 50% *E. coli* with 50% *P. aeruginosa*, (b) 50% *E. coli* with 50% *K. pneumoniae*, (c) 50% *S. aureus* with 50% *P. aeruginosa*, (d) 50% *S. aureus* with 50% *K. pneumoniae*, (e) 50% *P. aeruginosa* with 50% *K. pneumoniae*.

**Fig. S12.** MALDI-TOF MS of a bacterial mixture enriched by centrifugation in urine. (a) 67% *E. coli* with 33% *S. aureus*, (b) 67% *E. coli* with 33% *P. aeruginosa*, (c) 67% *E. coli* with 33% *K. pneumoniae*, (d) 67% *S. aureus* with 33% *P. aeruginosa*, (e) 67% *P. aeruginosa* with 33% *K. pneumoniae*.

**Fig. S13.** MALDI-TOF MS of a bacterial mixture enriched by Fc-MBL@Fe<sub>3</sub>O<sub>4</sub> in urine. (a) 67% *E. coli* with 33% *S. aureus*, (b) 67% *E. coli* with 33% *P. aeruginosa*, (c) 67% *E. coli* with 33% *K. pneumoniae*, (d) 67% *S. aureus* with 33% *P. aeruginosa*, (e) 67% *S. aureus* with 33% *K. pneumoniae*, (f) 67% *P. aeruginosa* with 33% *K. pneumoniae*.

**Table S1.** Identification scores for bacterial mixtures in urine enriched by Fc-MBL@Fe<sub>3</sub>O<sub>4</sub>.

#### **MALDI-TOF MS identification results details:**

The blue, yellow, and red bars in identification spectra represent high, medium, and low similarity between the sample and reference spectra, respectively. Cutoff values were defined as the relative error of *m/z* between the sample and reference peaks using the unit parts per million (ppm). The cutoff values for high, medium, and low similarity between a peak pair were <1000 ppm, 1000-1500 ppm, and >1500 ppm, respectively. The bacterial concentrations after enrichment were about 10<sup>8</sup> CFU·mL<sup>-1</sup>.

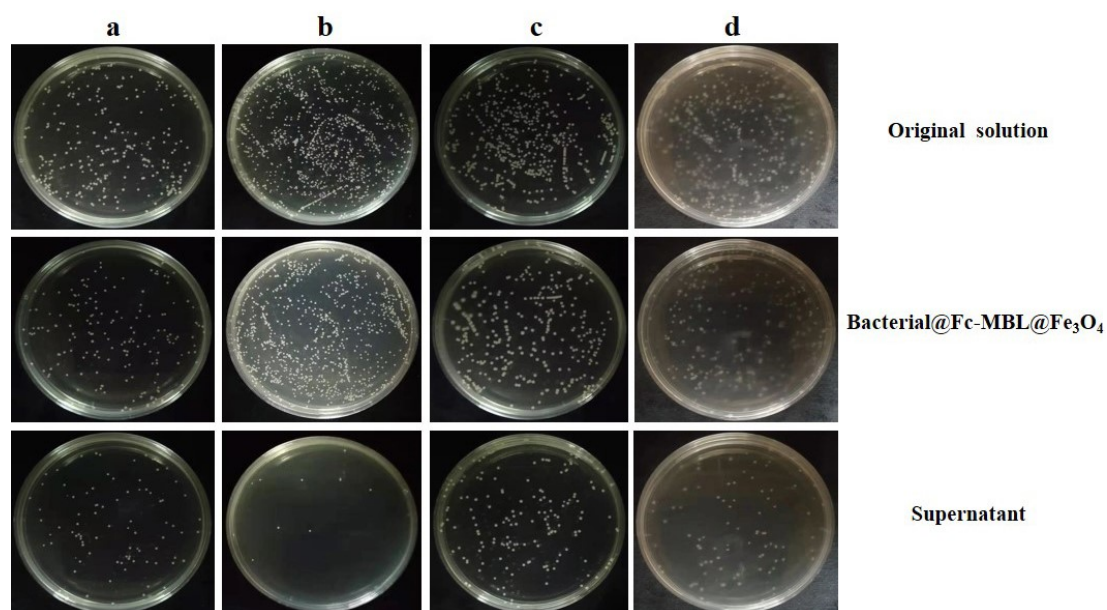

**Fig. S1.** Photograph of Fc-MBL@Fe<sub>3</sub>O<sub>4</sub> enrichment efficiency for select bacteria in urine. Bacterial culture from the original solution is shown in the first row. The enriched bacteria were cultured and shown in the second row, and the third row shows the culture of the remaining bacteria (i.e., non-enriched) left in the supernatant. (a) *E. coli*, (b) *S. aureus*, (c) *K. pneumoniae*, and (d) *P. aeruginosa*.

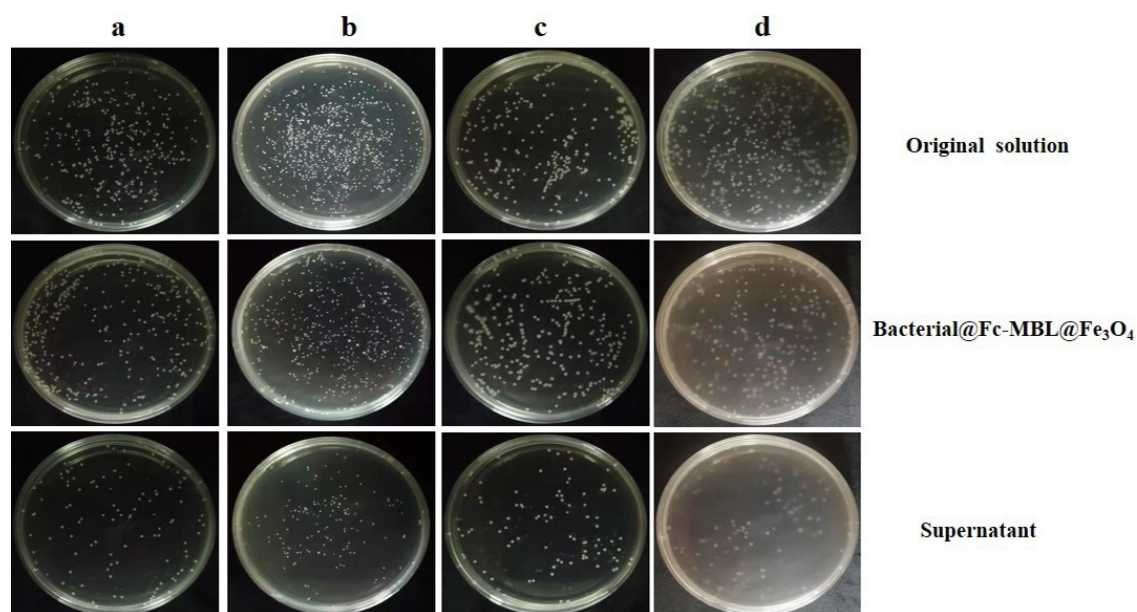

**Fig. S2.** Photograph of Fc-MBL@Fe<sub>3</sub>O<sub>4</sub> enrichment efficiency for select bacteria in aqueous solution. Bacterial culture from the original solution is shown in the first row. The enriched bacteria were cultured and shown in the second row, and the third row shows the culture of the remaining bacteria (i.e., non-enriched) left in the supernatant. (a) *E. coli*, (b) *S. aureus*, (c) *K. pneumoniae*, and (d) *P. aeruginosa*.

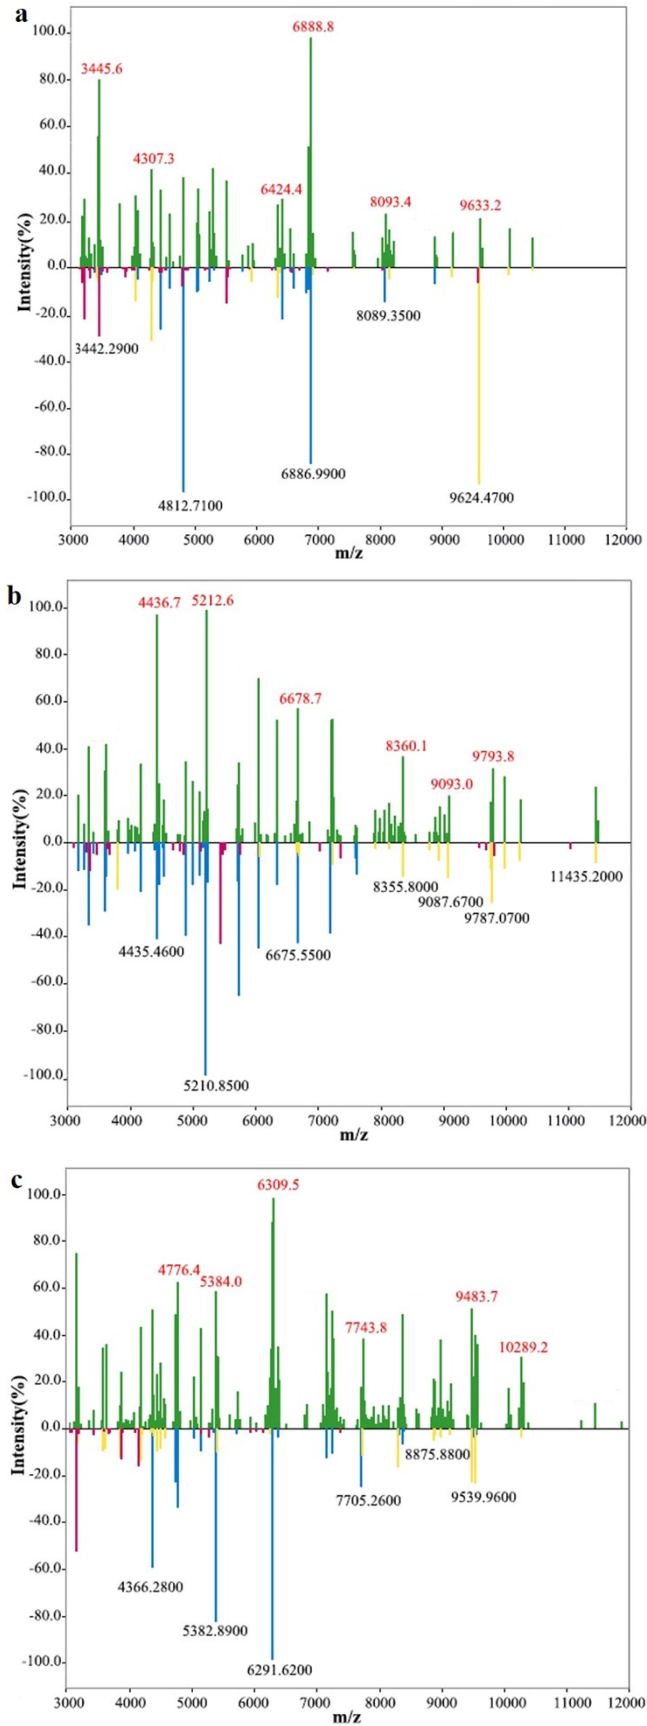

**Fig. S3.** MALDI-TOF MS of a single bacterial strain enriched by Fc-MBL@Fe<sub>3</sub>O<sub>4</sub> from urine. (a) *S. aureus*, (b) *P. aeruginosa*, and (c) *K. pneumoniae*.

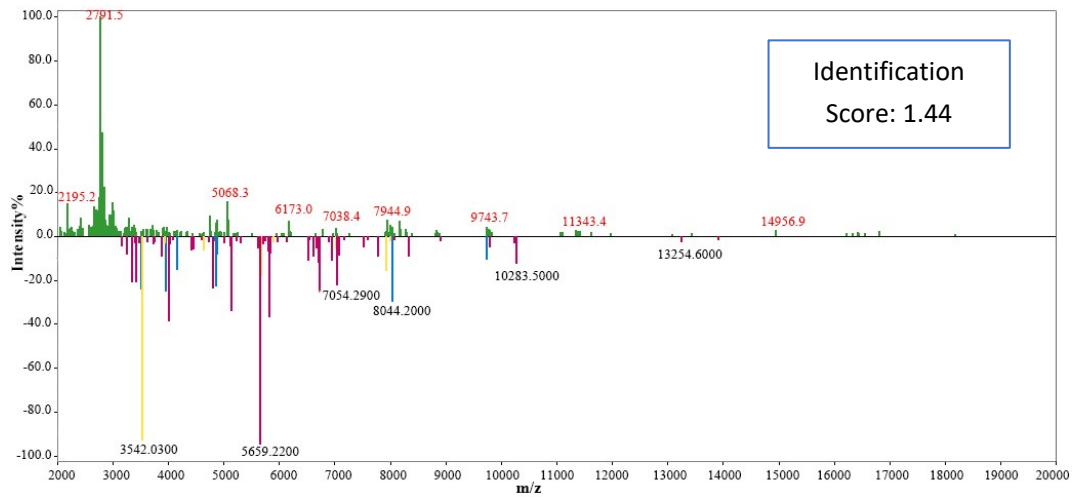

**Fig. S4.** MALDI-TOF MS identification of a urine sample from a healthy person with identification score 1.44.

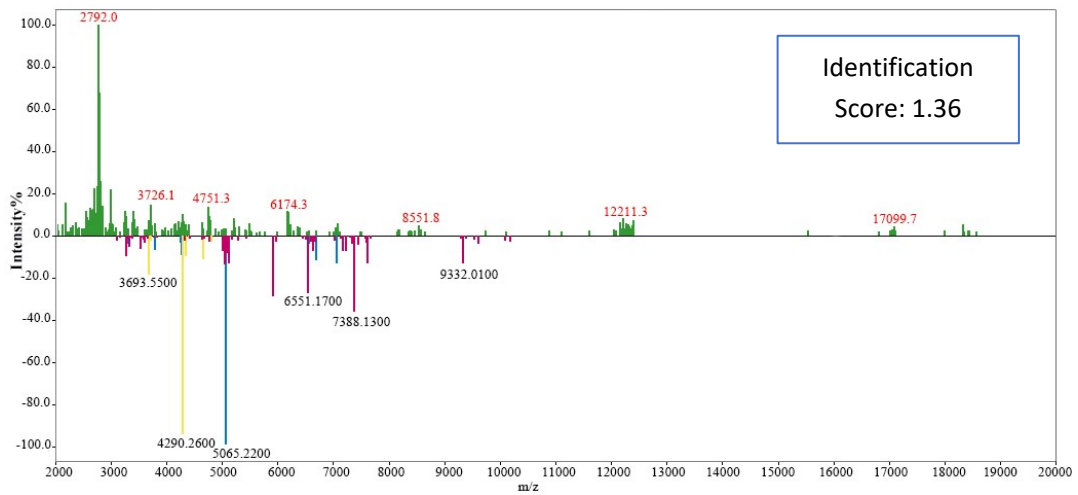

**Fig. S5.** MALDI-TOF MS identification of a bacteriuria sample without bacterial enrichment with identification score 1.36. The pathogen was *E. coli* and the colony counts were about  $5.0 \times 10^5$  CFU·mL<sup>-1</sup>.

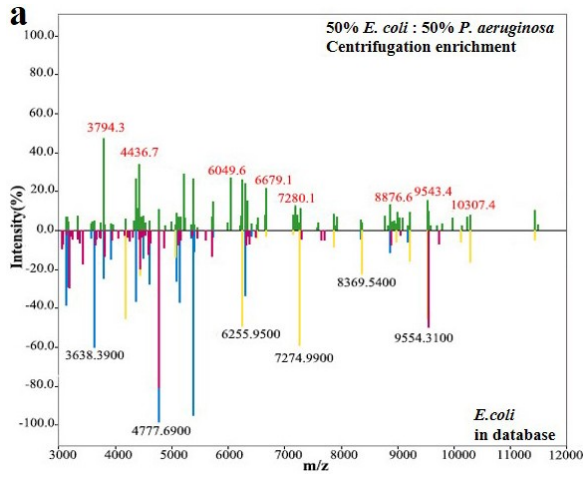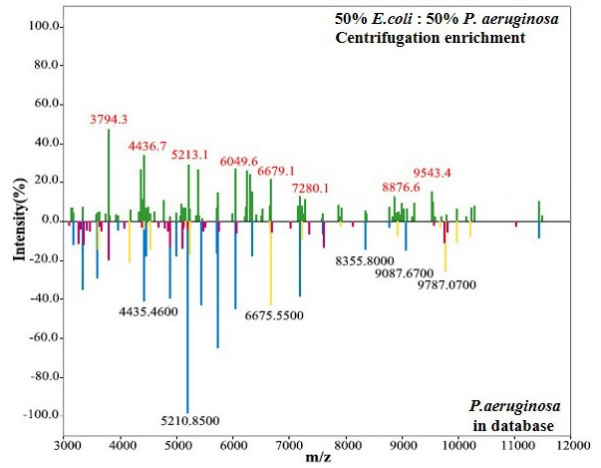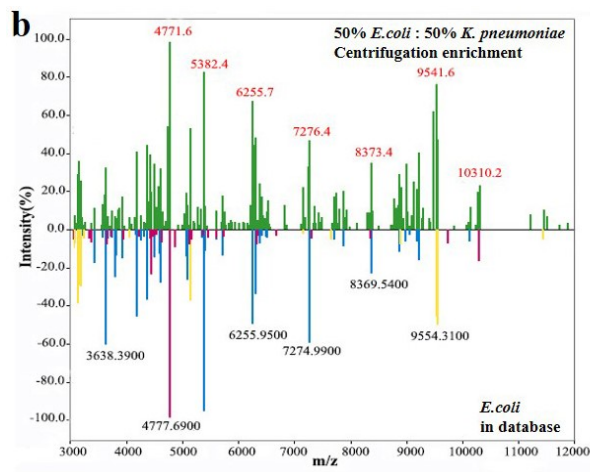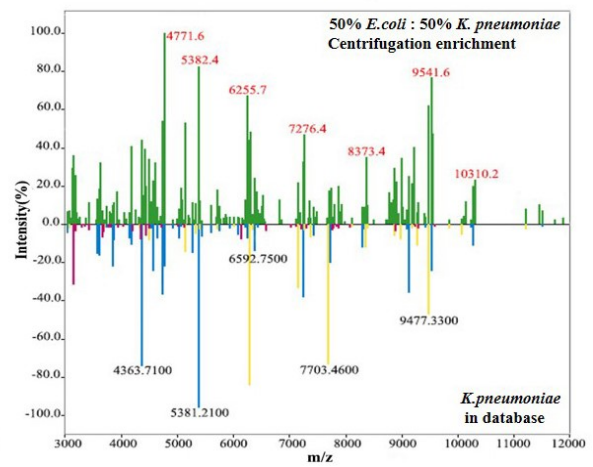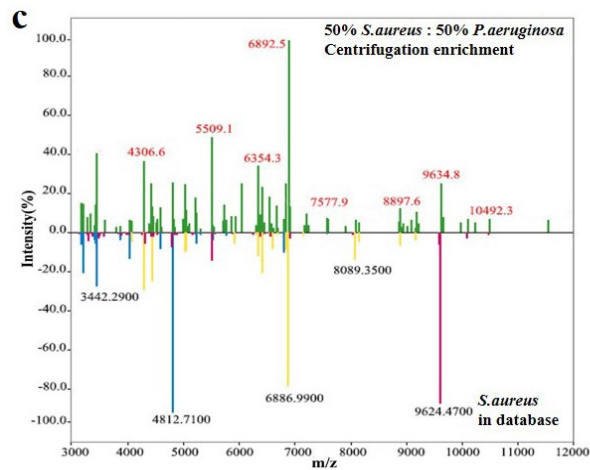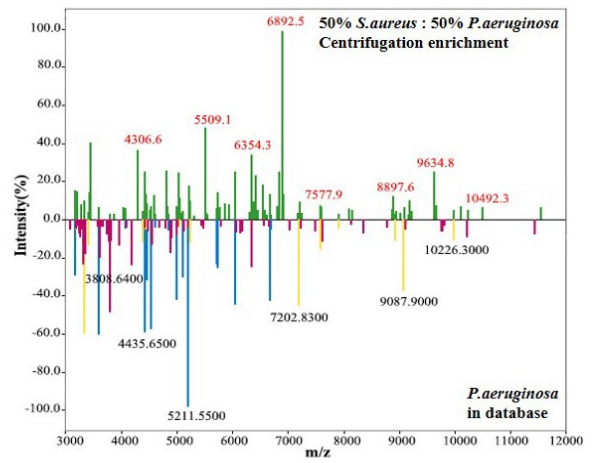



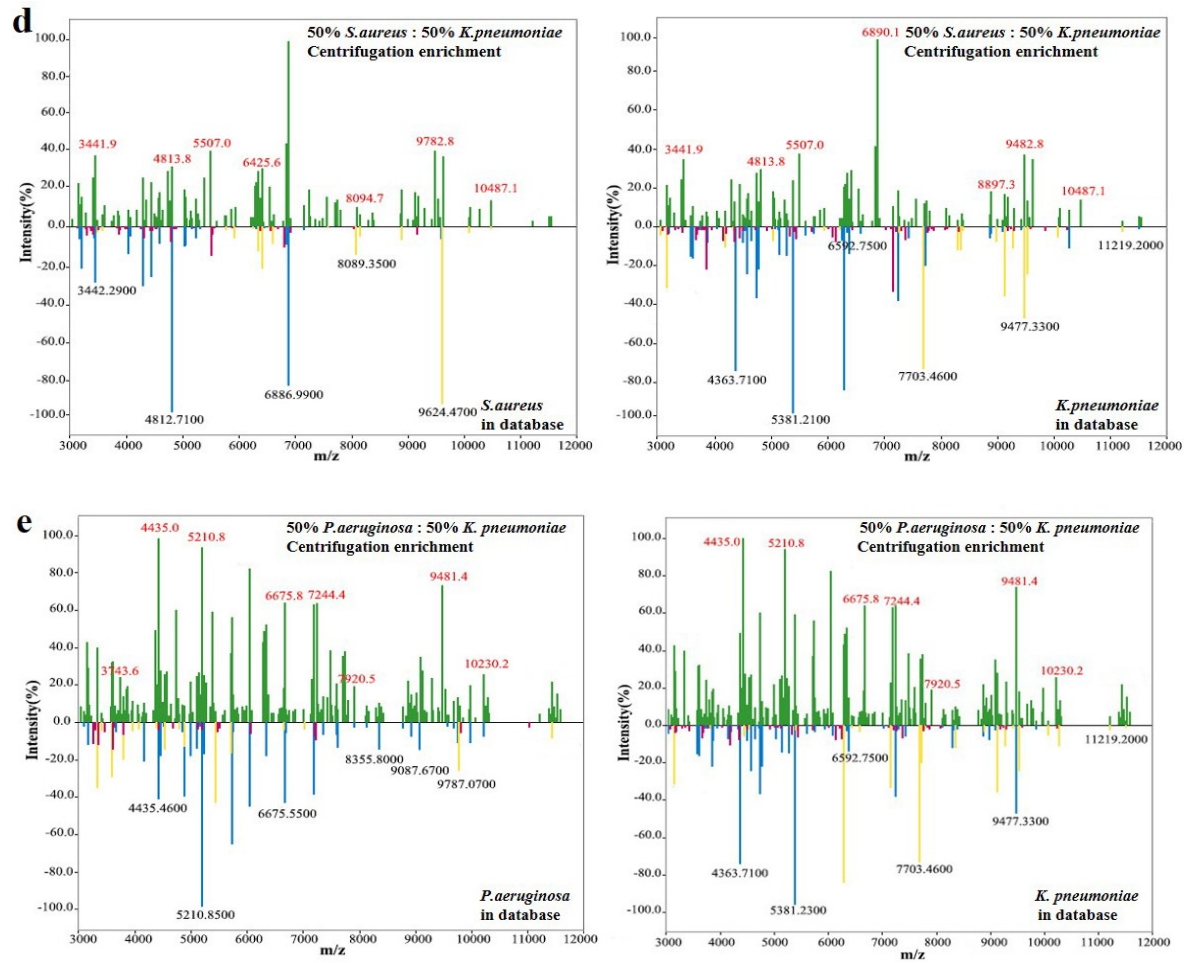

**Fig. S6.** MALDI-TOF MS of a bacterial mixture enriched by centrifugation in aqueous solution. (a) 50% *E. coli* with 50% *P. aeruginosa*, (b) 50% *E. coli* with 50% *K. pneumoniae*, (c) 50% *S. aureus* with 50% *P. aeruginosa*, (d) 50% *S. aureus* with 50% *K. pneumoniae*, (e) 50% *P. aeruginosa* with 50% *K. pneumoniae*.

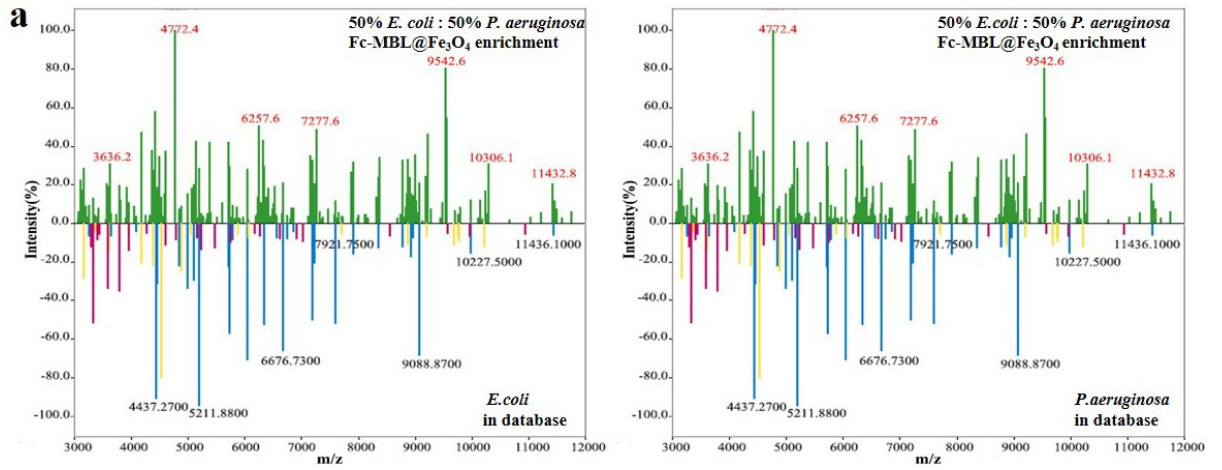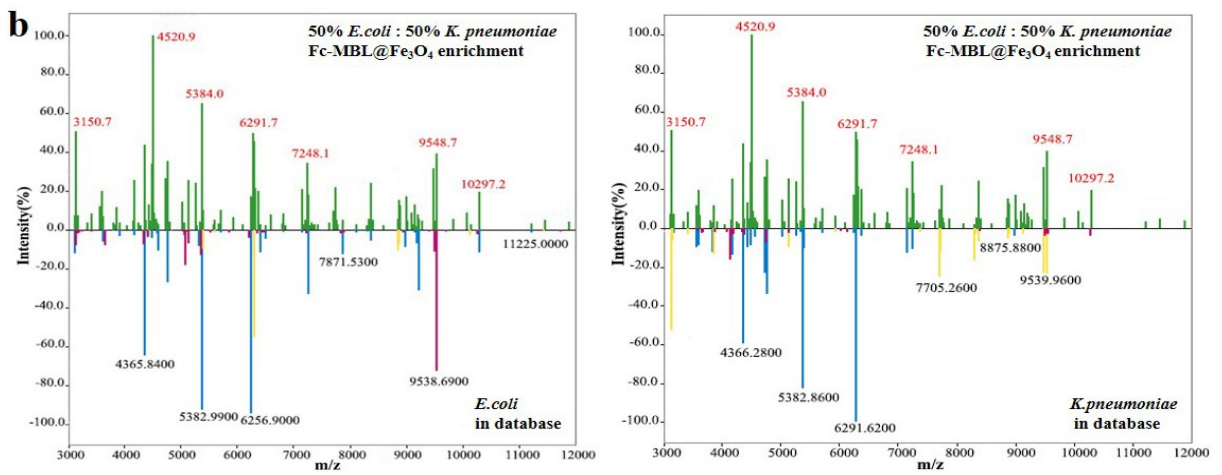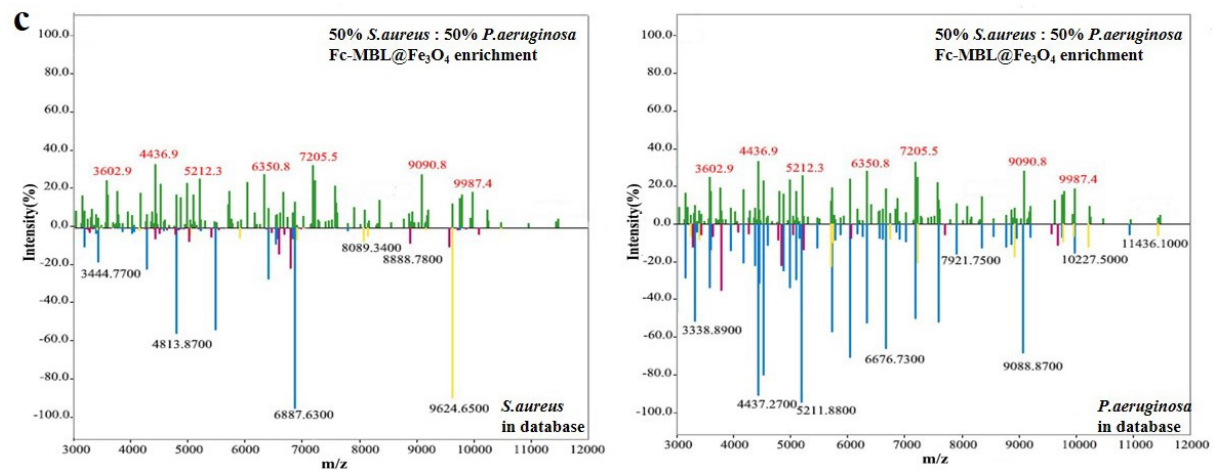



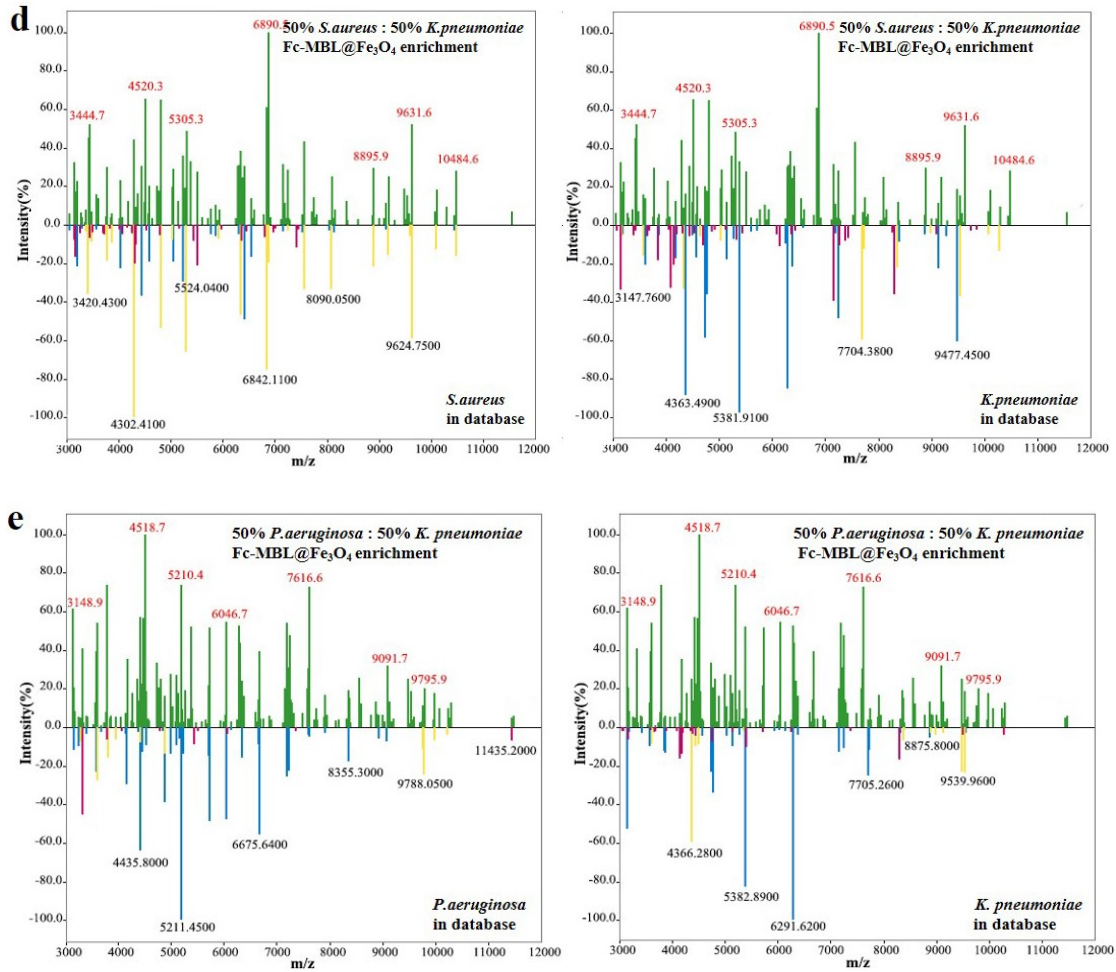

**Fig. S7.** MALDI-TOF MS of a bacterial mixture enriched by Fc-MBL@Fe<sub>3</sub>O<sub>4</sub> in aqueous solution. (a) 50% *E. coli* with 50% *P. aeruginosa*, (b) 50% *E. coli* with 50% *K. pneumoniae*, (c) 50% *S. aureus* with 50% *P. aeruginosa*, (d) 50% *S. aureus* with 50% *K. pneumoniae*, (e) 50% *P. aeruginosa* with 50% *K. pneumoniae*.

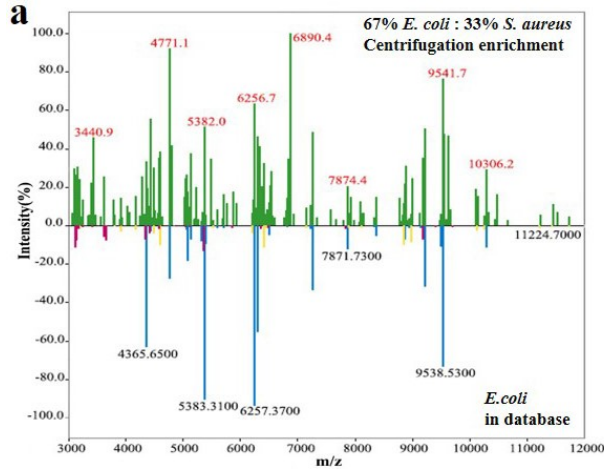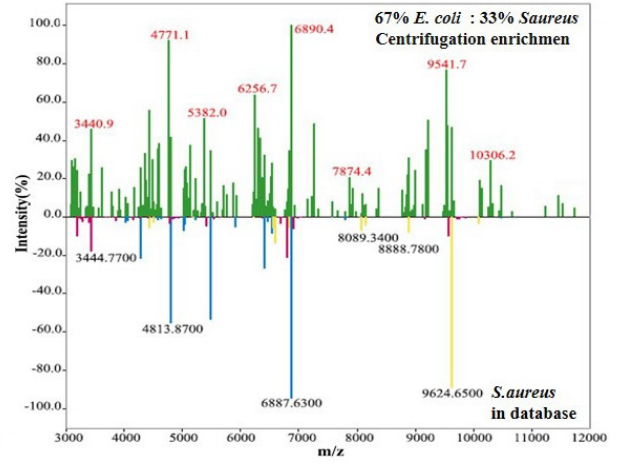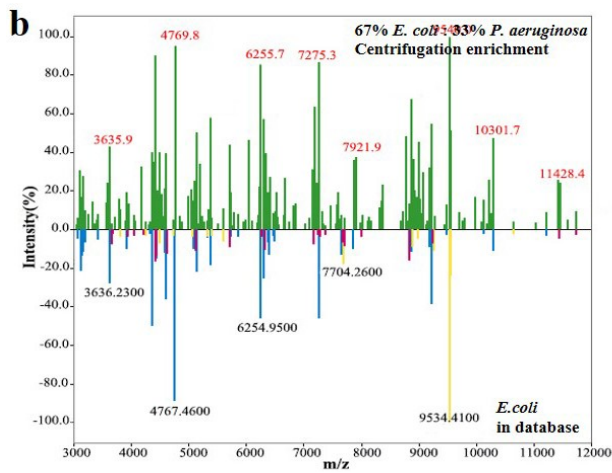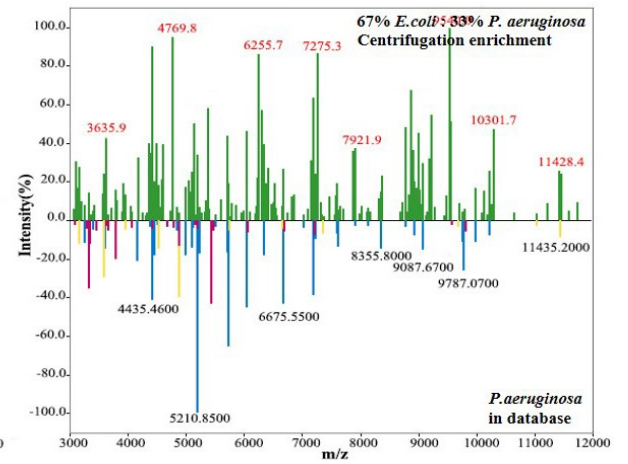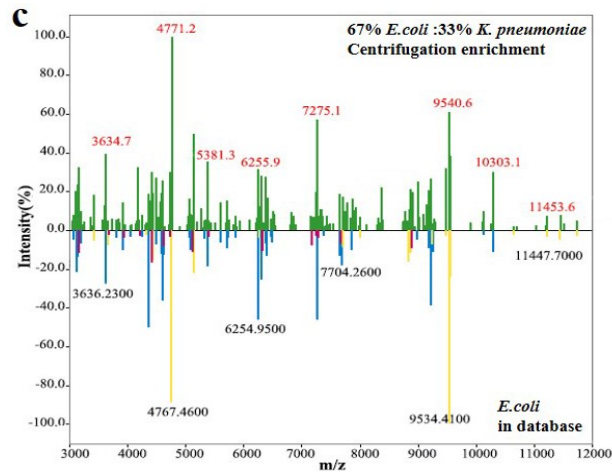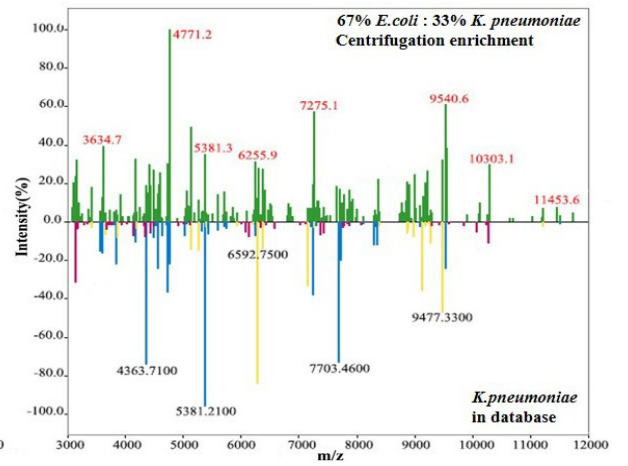

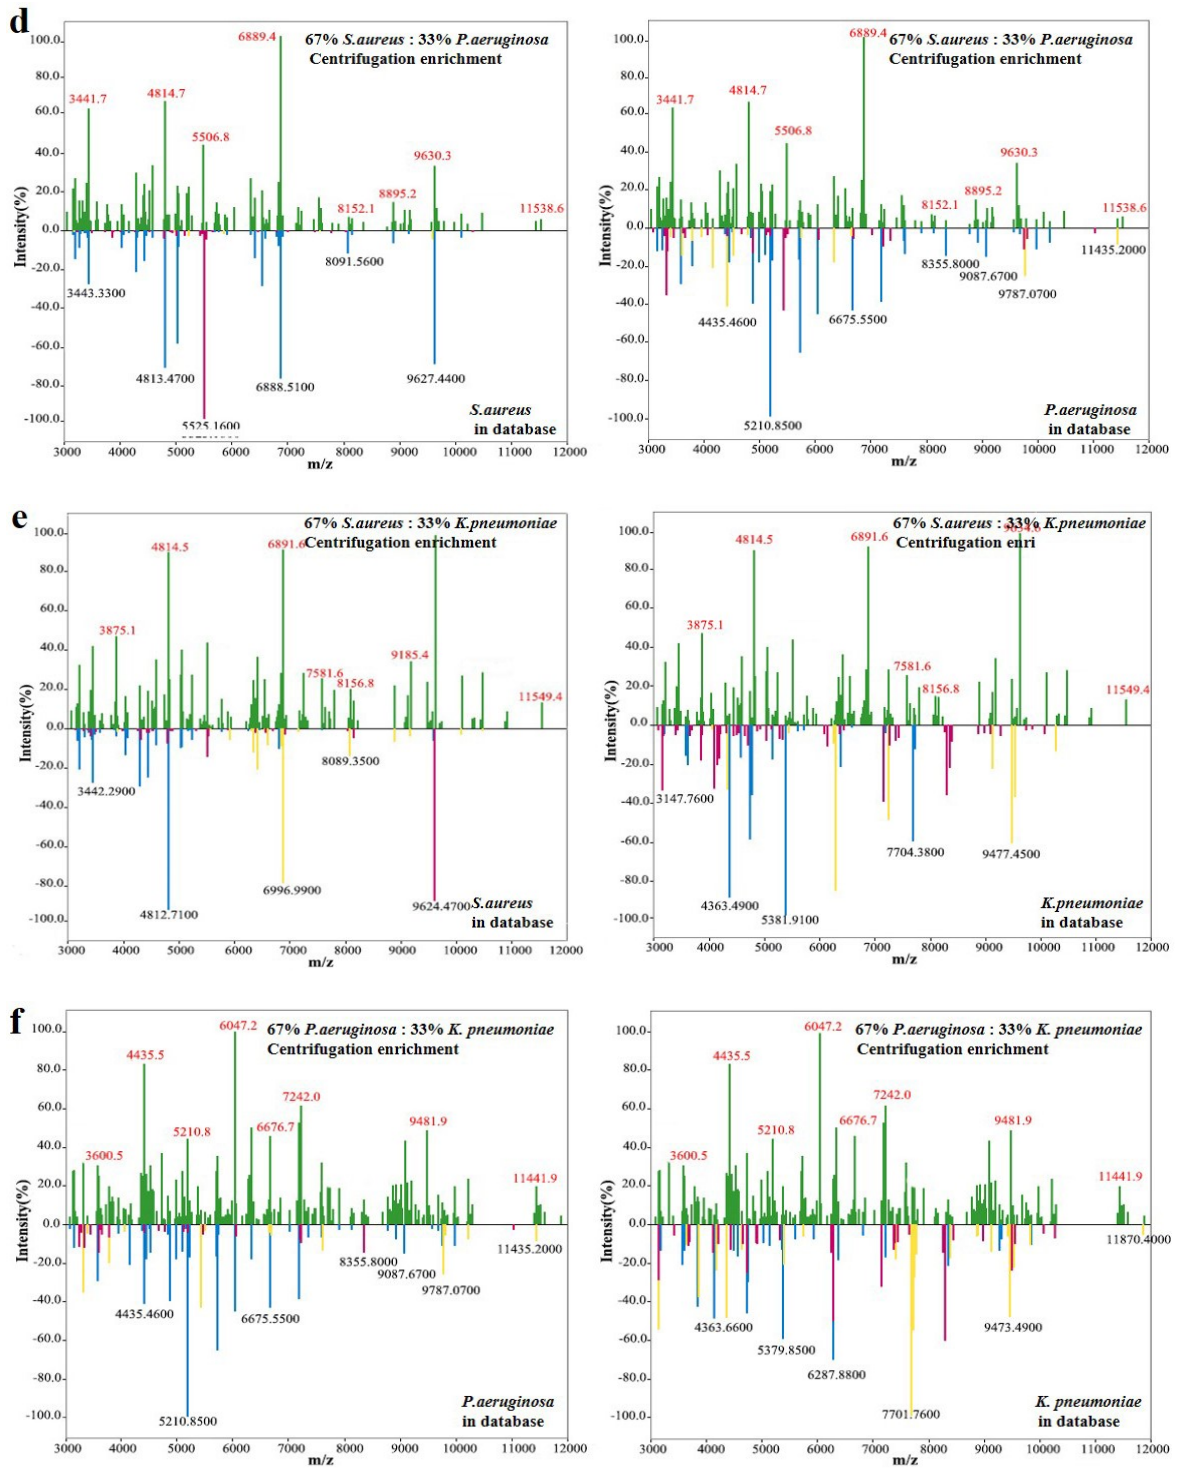

**Fig. S8.** MALDI-TOF MS of a bacterial mixture enriched by centrifugation in aqueous solution. (a) 67% *E. coli* with 33% *S. aureus*, (b) 67% *E. coli* with 33% *P. aeruginosa*, (c) 67% *E. coli* with 33% *K. pneumoniae*, (d) 67% *S. aureus* with 33% *P. aeruginosa*, (e) 67% *S. aureus* with 33% *K. pneumoniae*, (f) 67% *P. aeruginosa* with 33% *K. pneumoniae*.

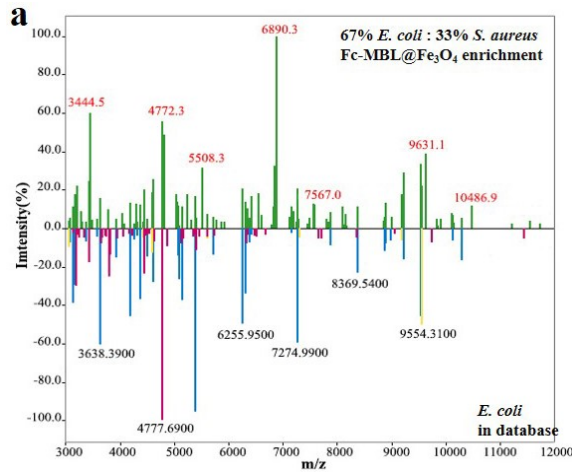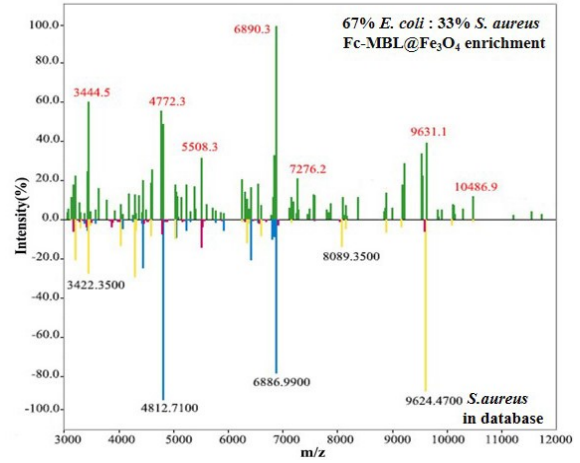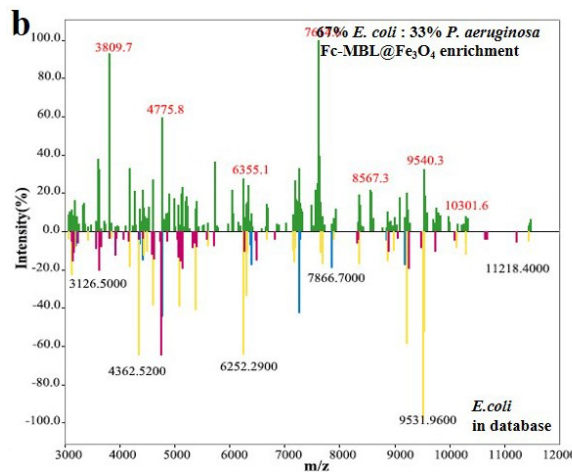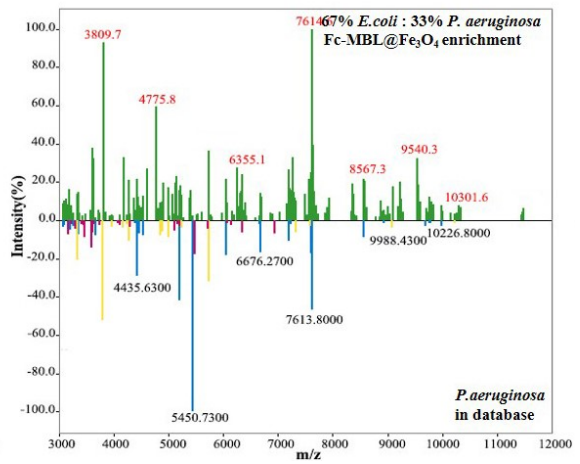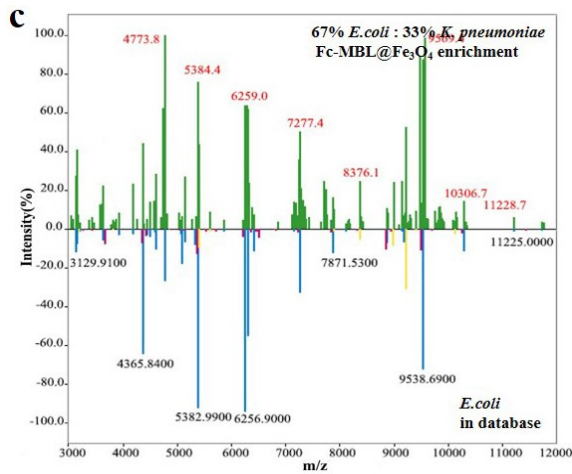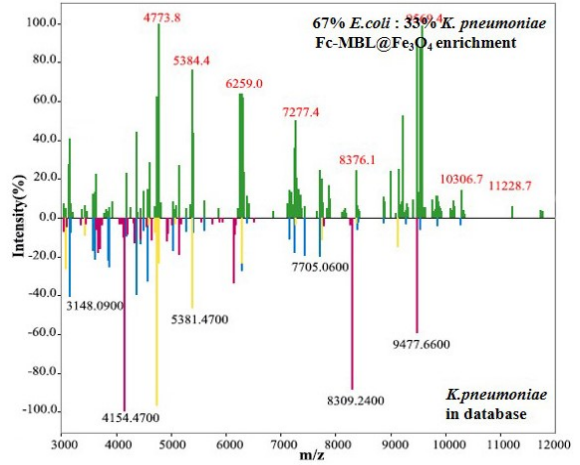



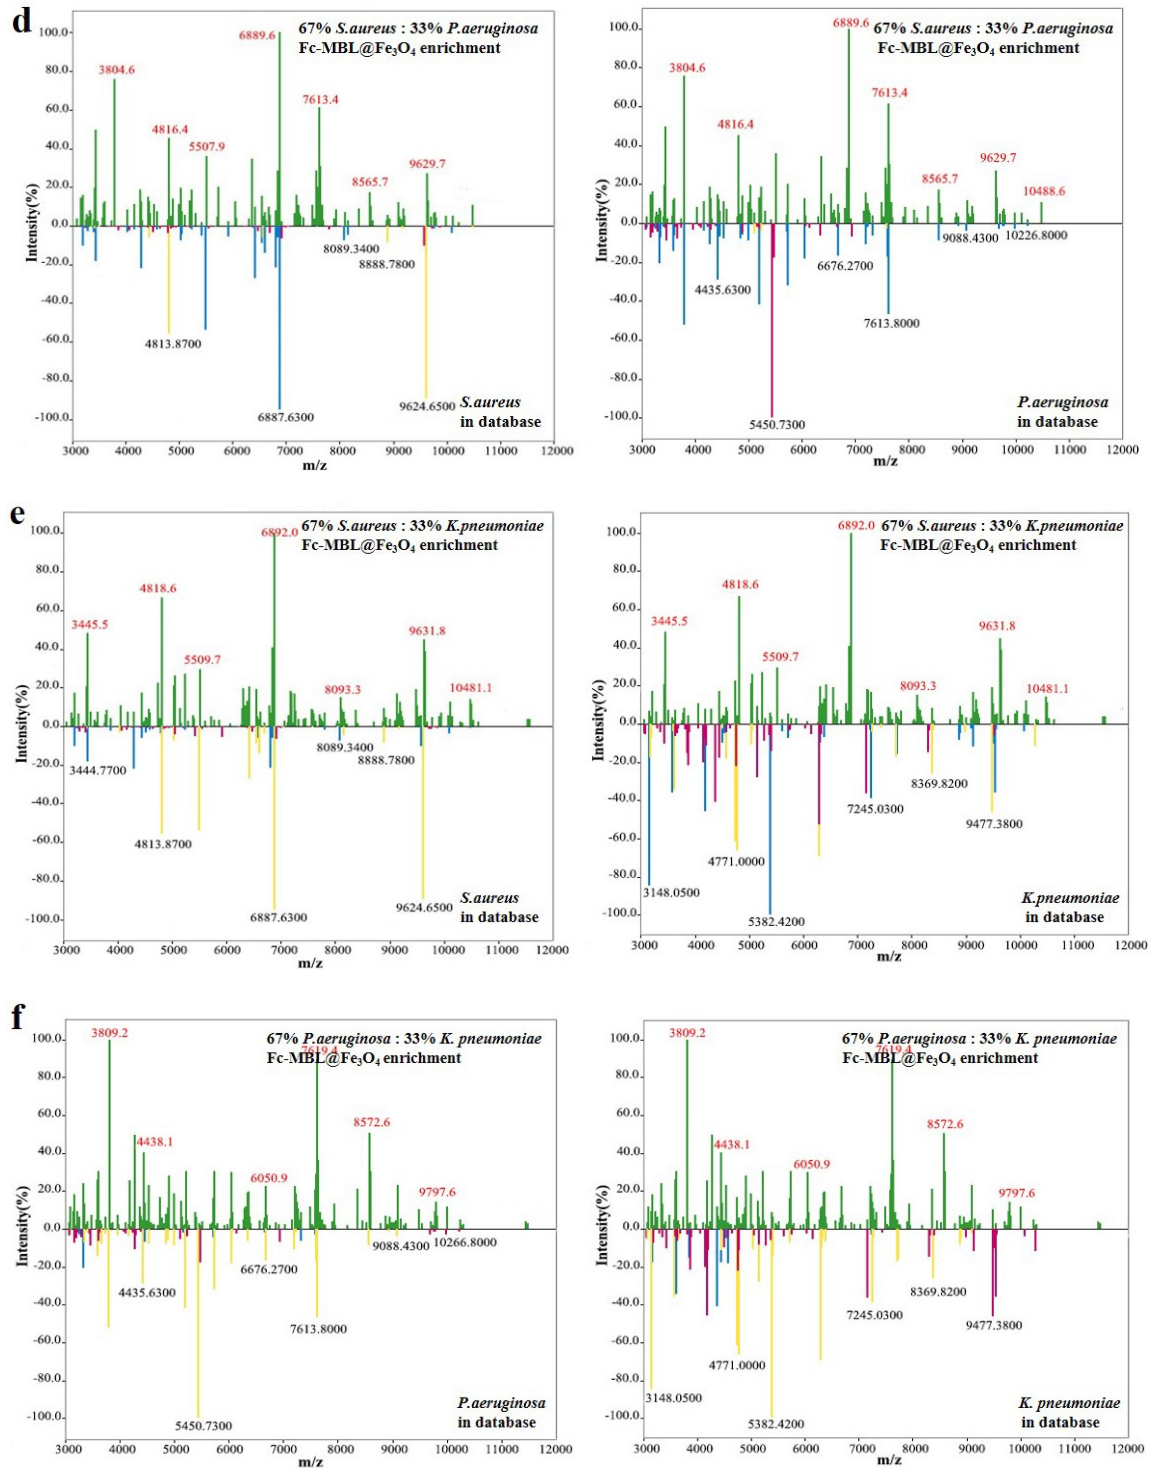

**Fig. S9.** MALDI-TOF MS of a bacterial mixture enriched by Fc-MBL@Fe<sub>3</sub>O<sub>4</sub> in aqueous solution. (a) 67% *E. coli* with 33% *S. aureus*, (b) 67% *E. coli* with 33% *P. aeruginosa*, (c) 67% *E. coli* with 33% *K. pneumoniae*, (d) 67% *S. aureus* with 33% *P. aeruginosa*, (e) 67% *S. aureus* with 33% *K. pneumoniae*, (f) 67% *P. aeruginosa* with 33% *K. pneumoniae*.

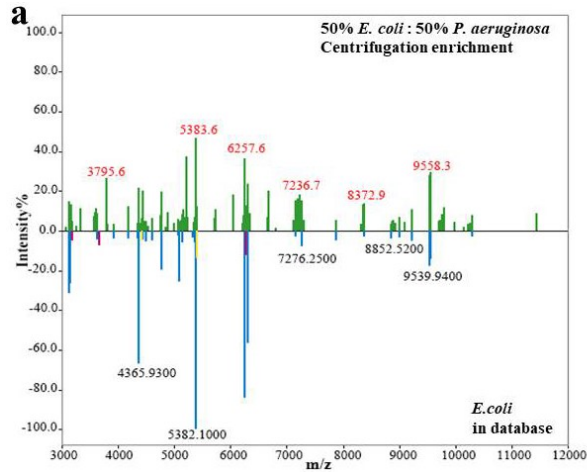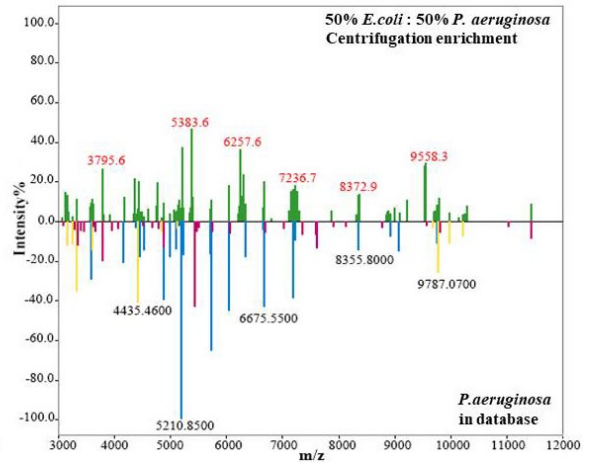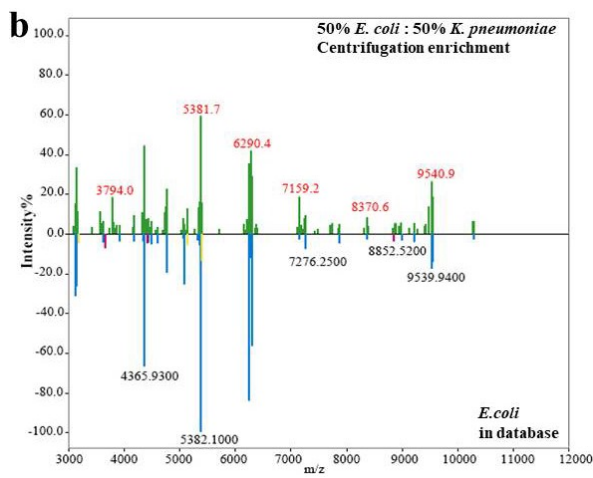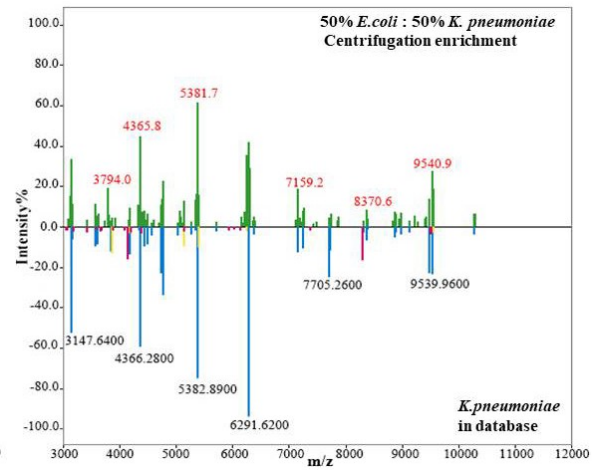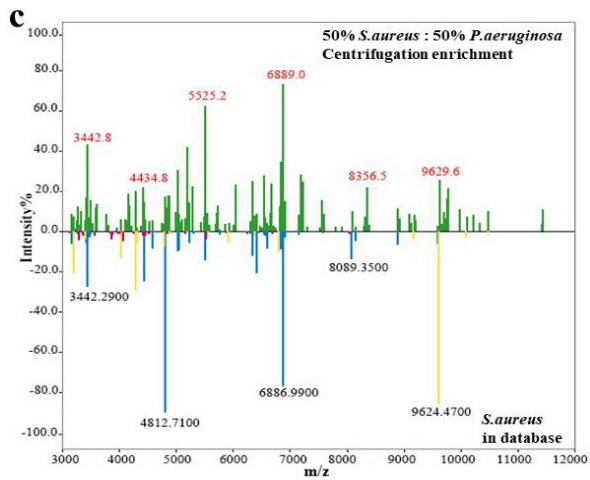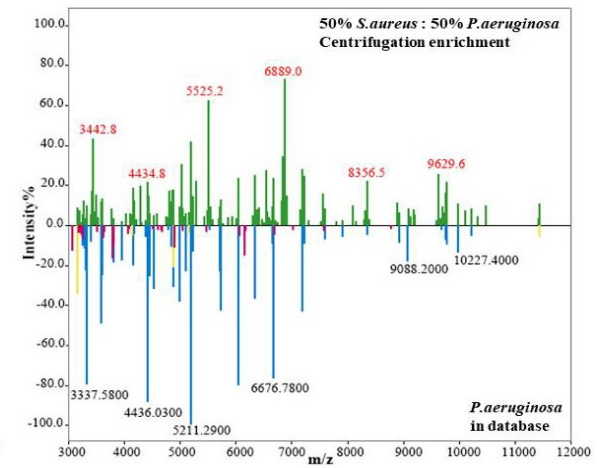



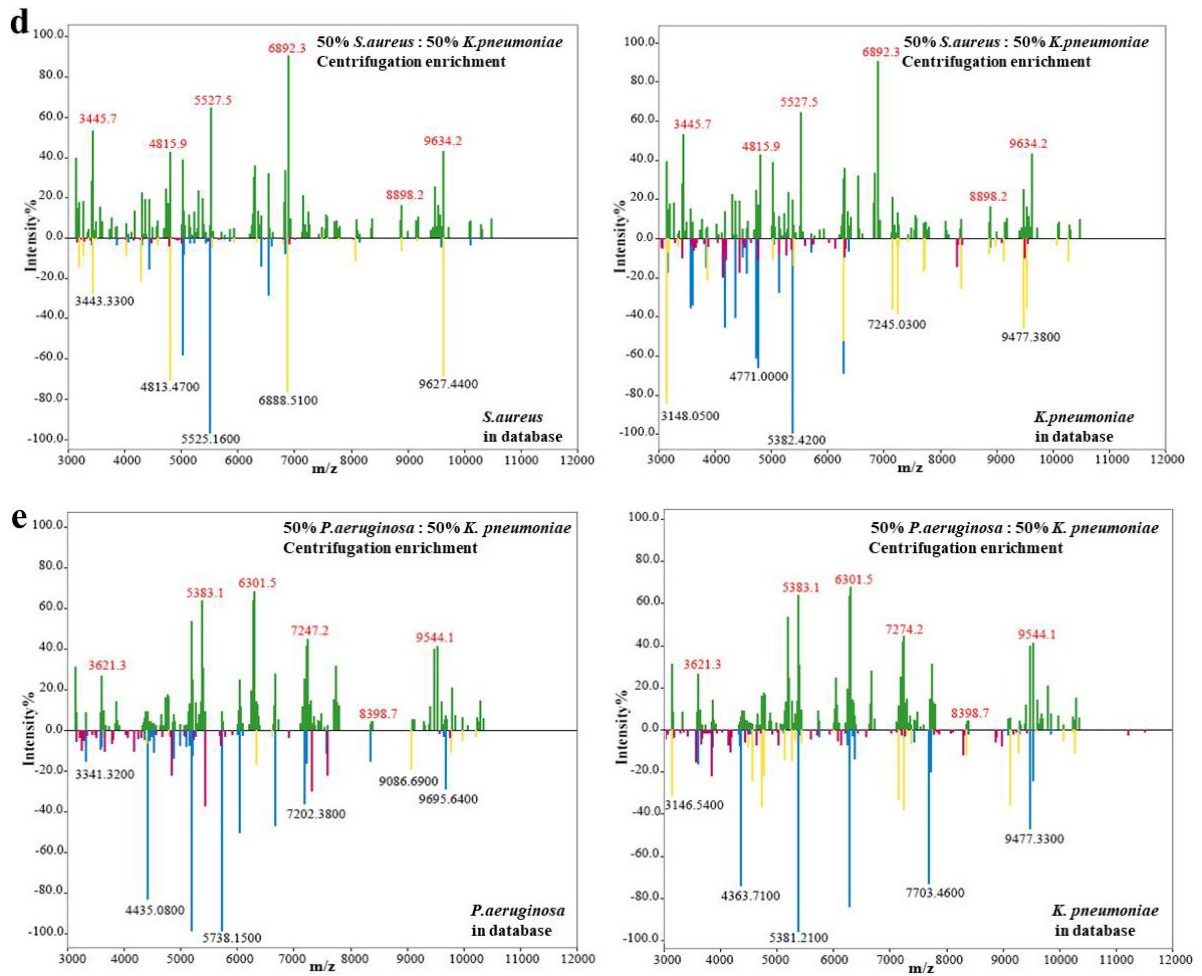

**Fig. S10.** MALDI-TOF MS of a bacterial mixture enriched by centrifugation in urine. (a) 50% *E. coli* with 50% *P. aeruginosa*, (b) 50% *E. coli* with 50% *K. pneumoniae*, (c) 50% *S. aureus* with 50% *P. aeruginosa*, (d) 50% *S. aureus* with 50% *K. pneumoniae*, (e) 50% *P. aeruginosa* with 50% *K. pneumoniae*

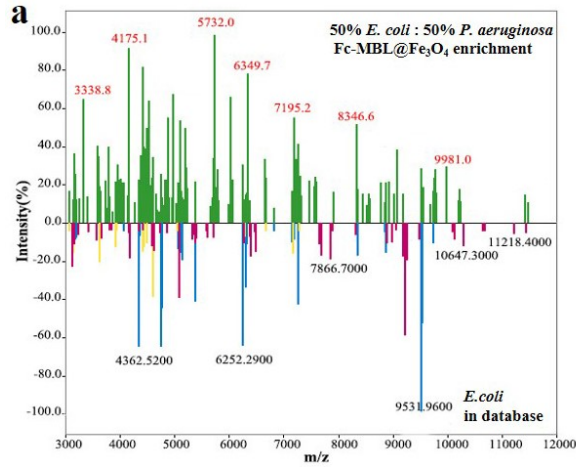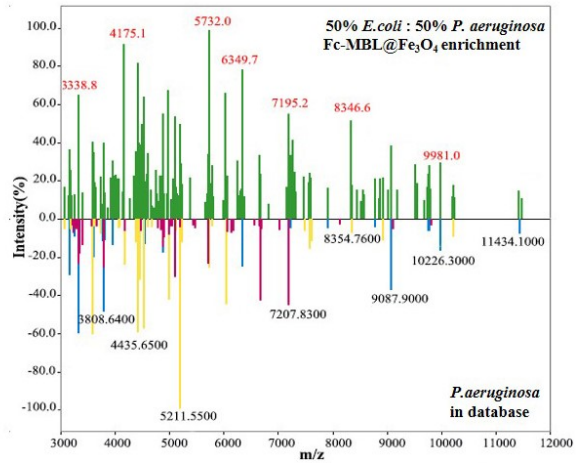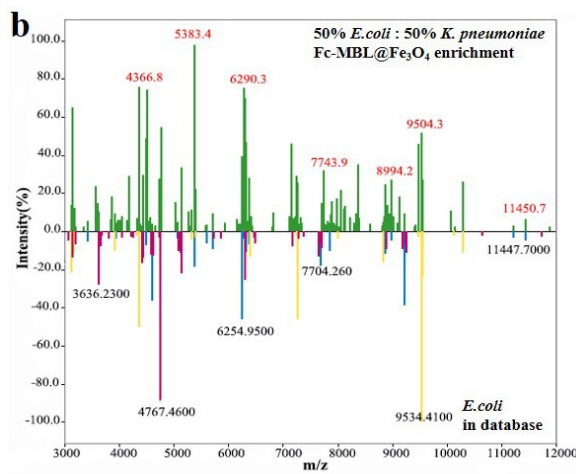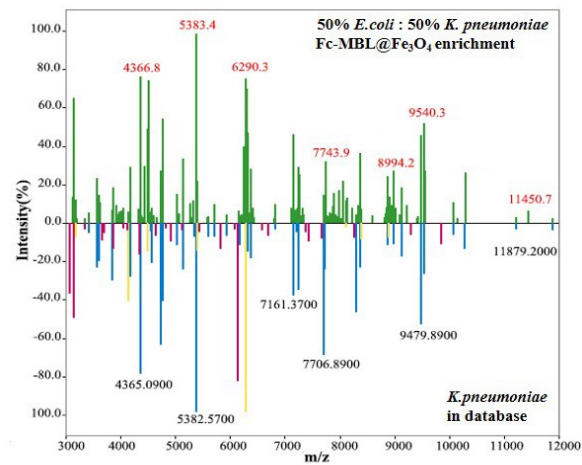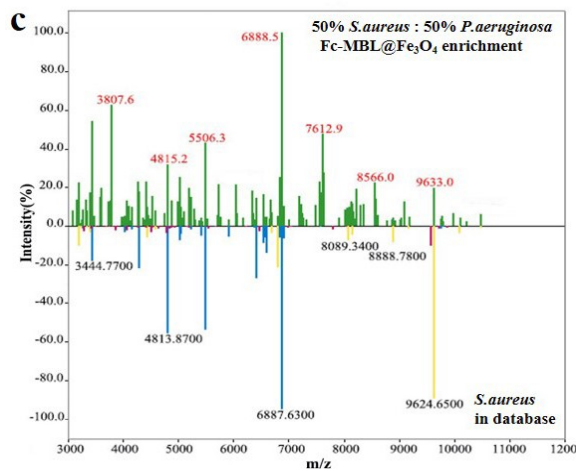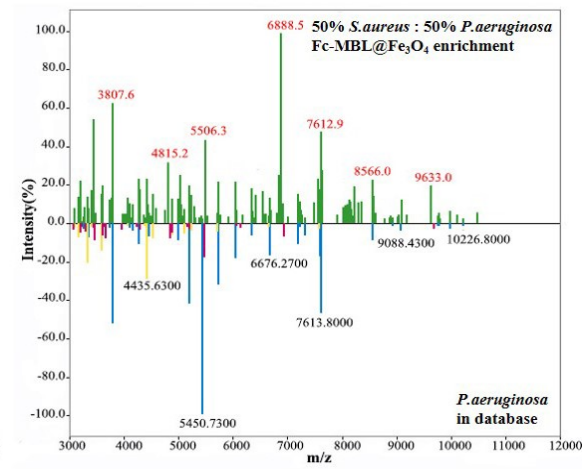

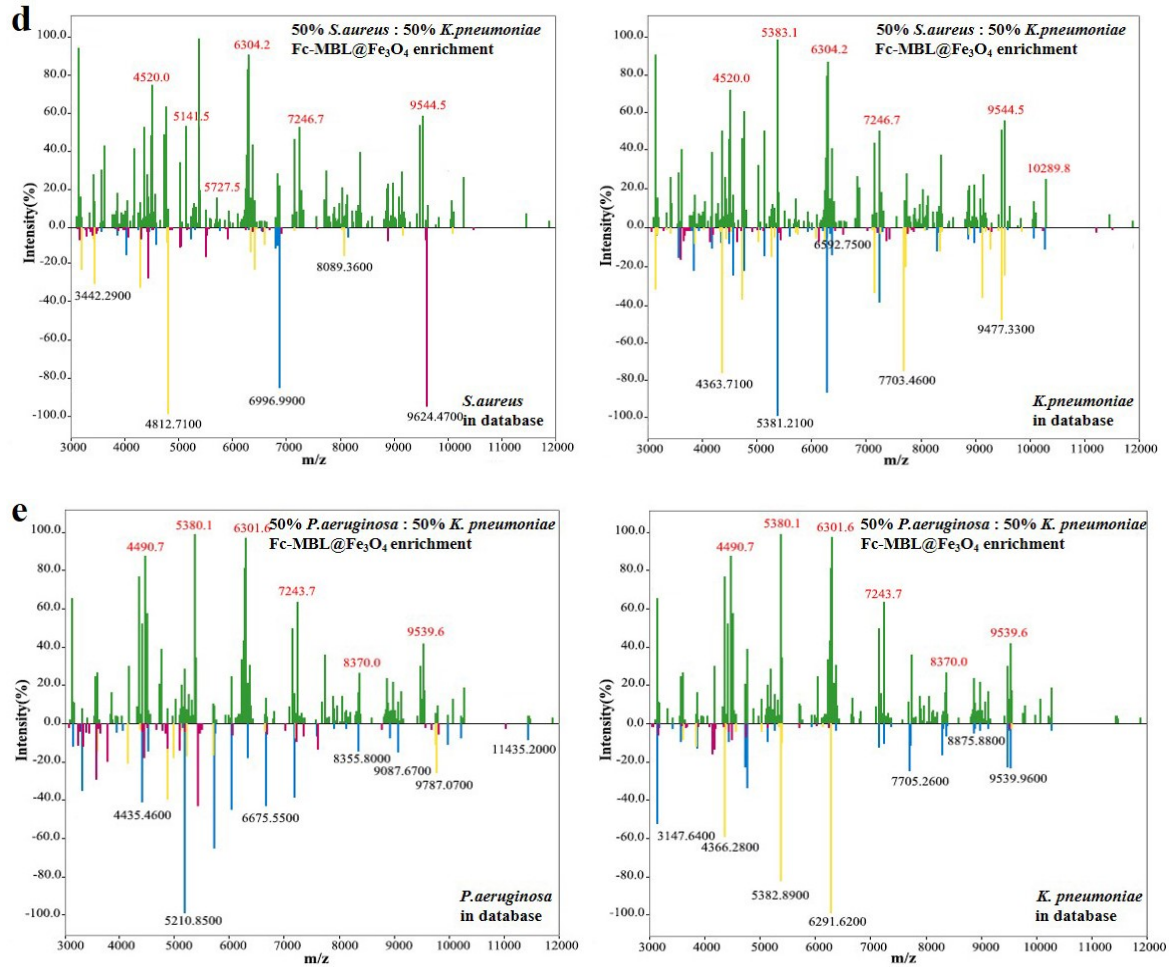

**Fig. S11.** MALDI-TOF MS of a bacterial mixture enriched by Fc-MBL@Fe<sub>3</sub>O<sub>4</sub> in urine. (a) 50% *E. coli* with 50% *P. aeruginosa*, (b) 50% *E. coli* with 50% *K. pneumoniae*, (c) 50% *S. aureus* with 50% *P. aeruginosa*, (d) 50% *S. aureus* with 50% *K. pneumoniae*, (e) 50% *P. aeruginosa* with 50% *K. pneumoniae*.

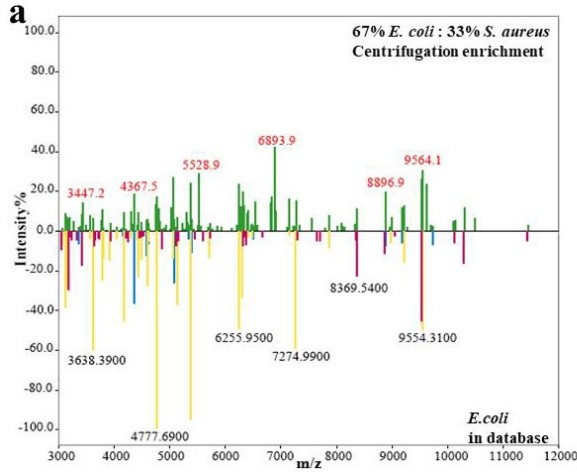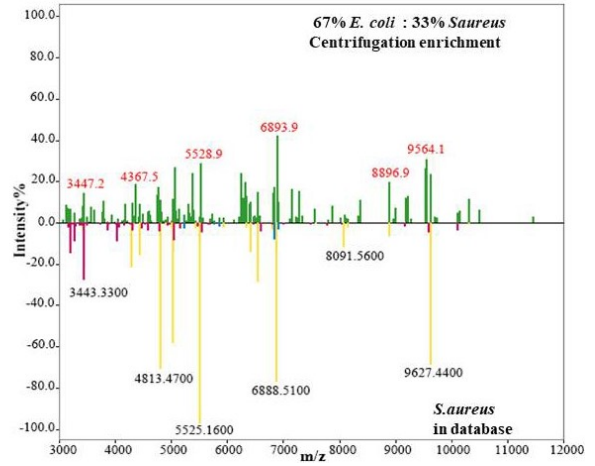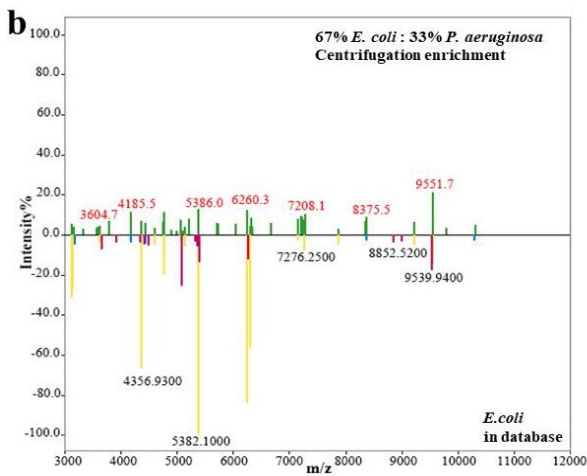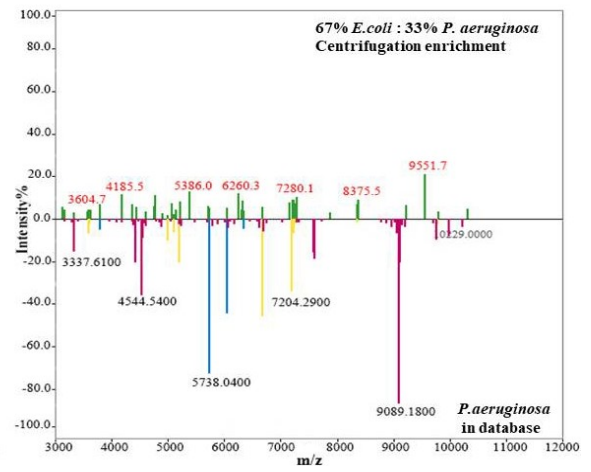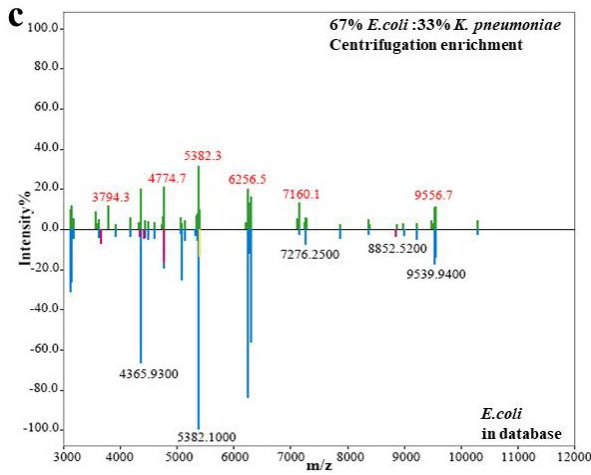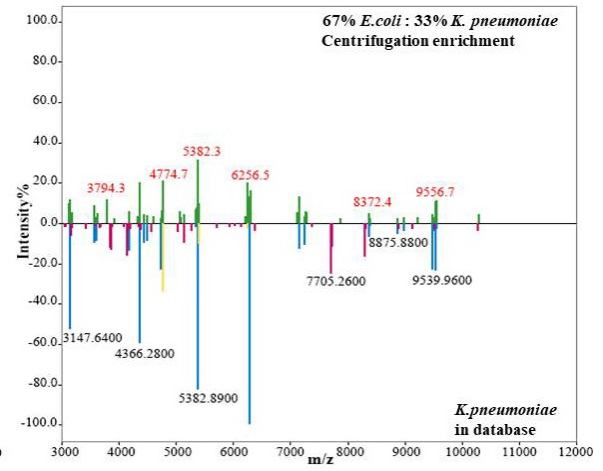

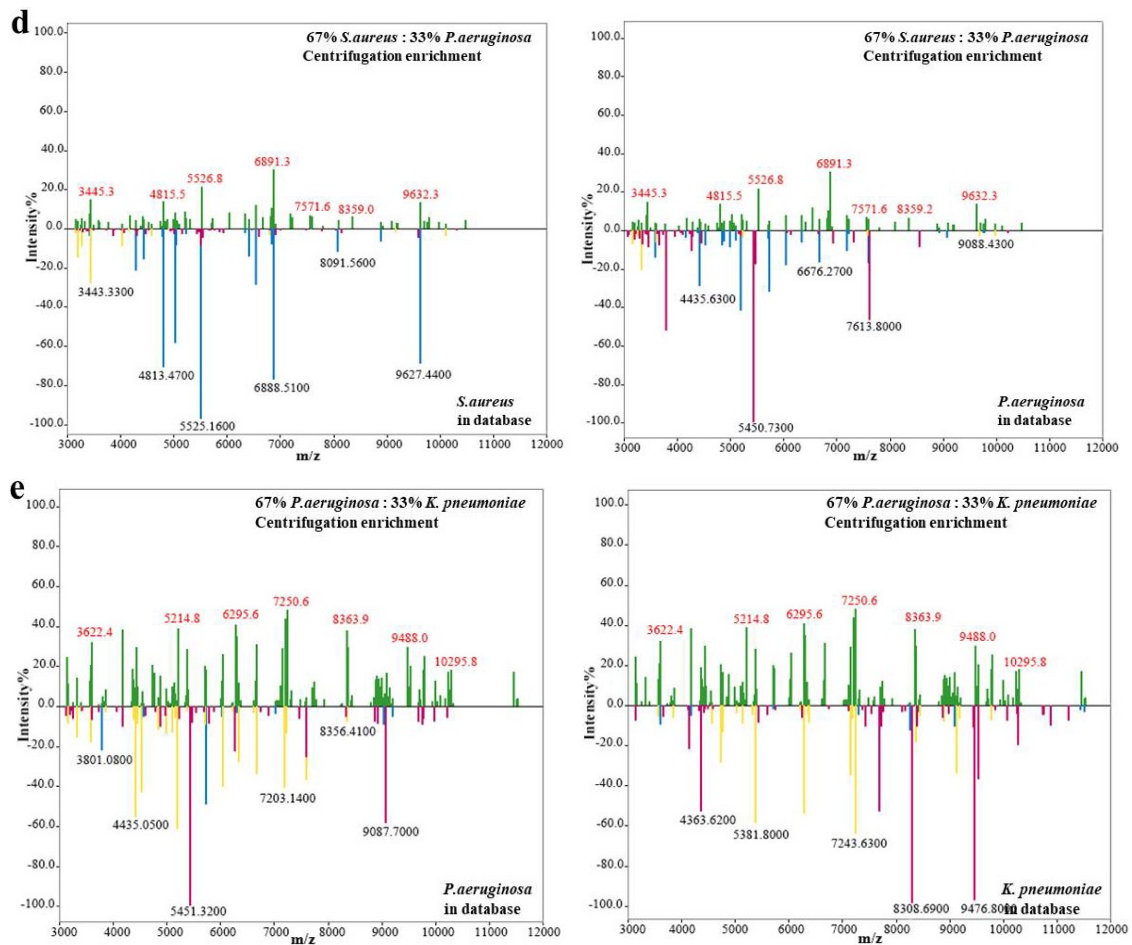

**Fig. S12.** MALDI-TOF MS of a bacterial mixture enriched by centrifugation in urine. (a) 67% *E. coli* with 33% *S. aureus*, (b) 67% *E. coli* with 33% *P. aeruginosa*, (c) 67% *E. coli* with 33% *K. pneumoniae*, (d) 67% *S. aureus* with 33% *P. aeruginosa*, (e) 67% *P. aeruginosa* with 33% *K. pneumoniae*.



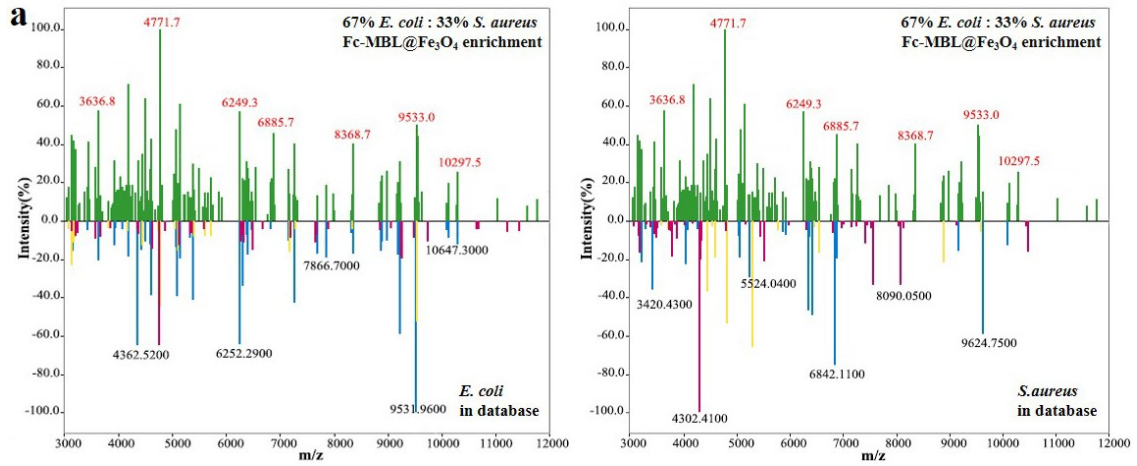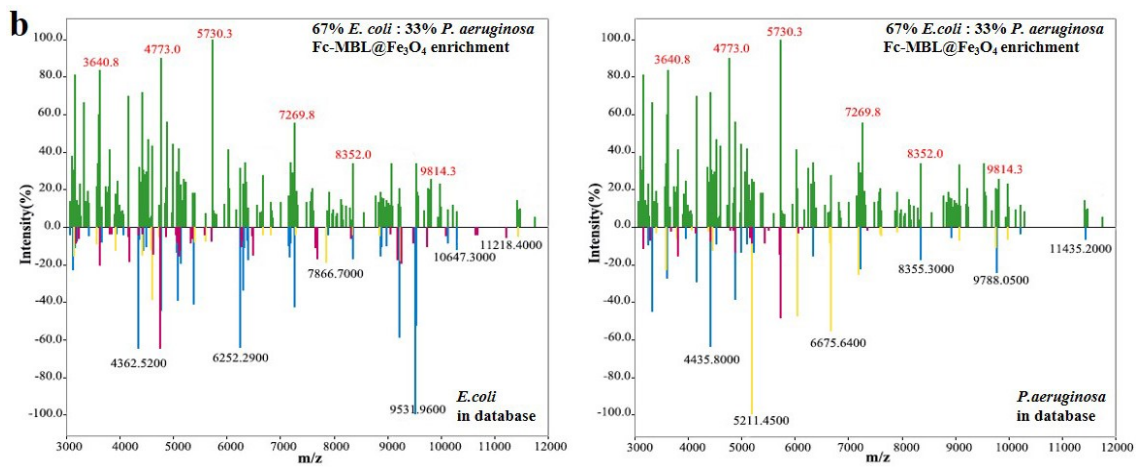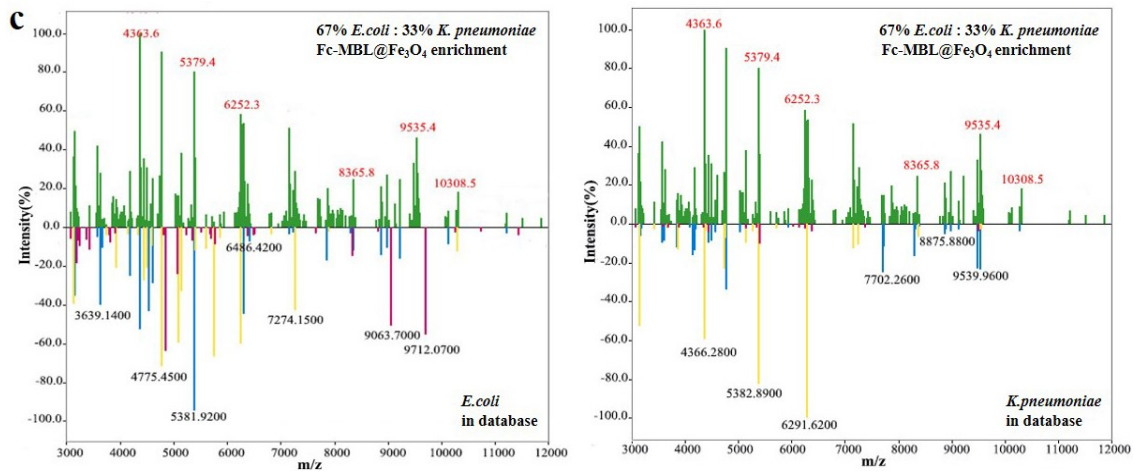



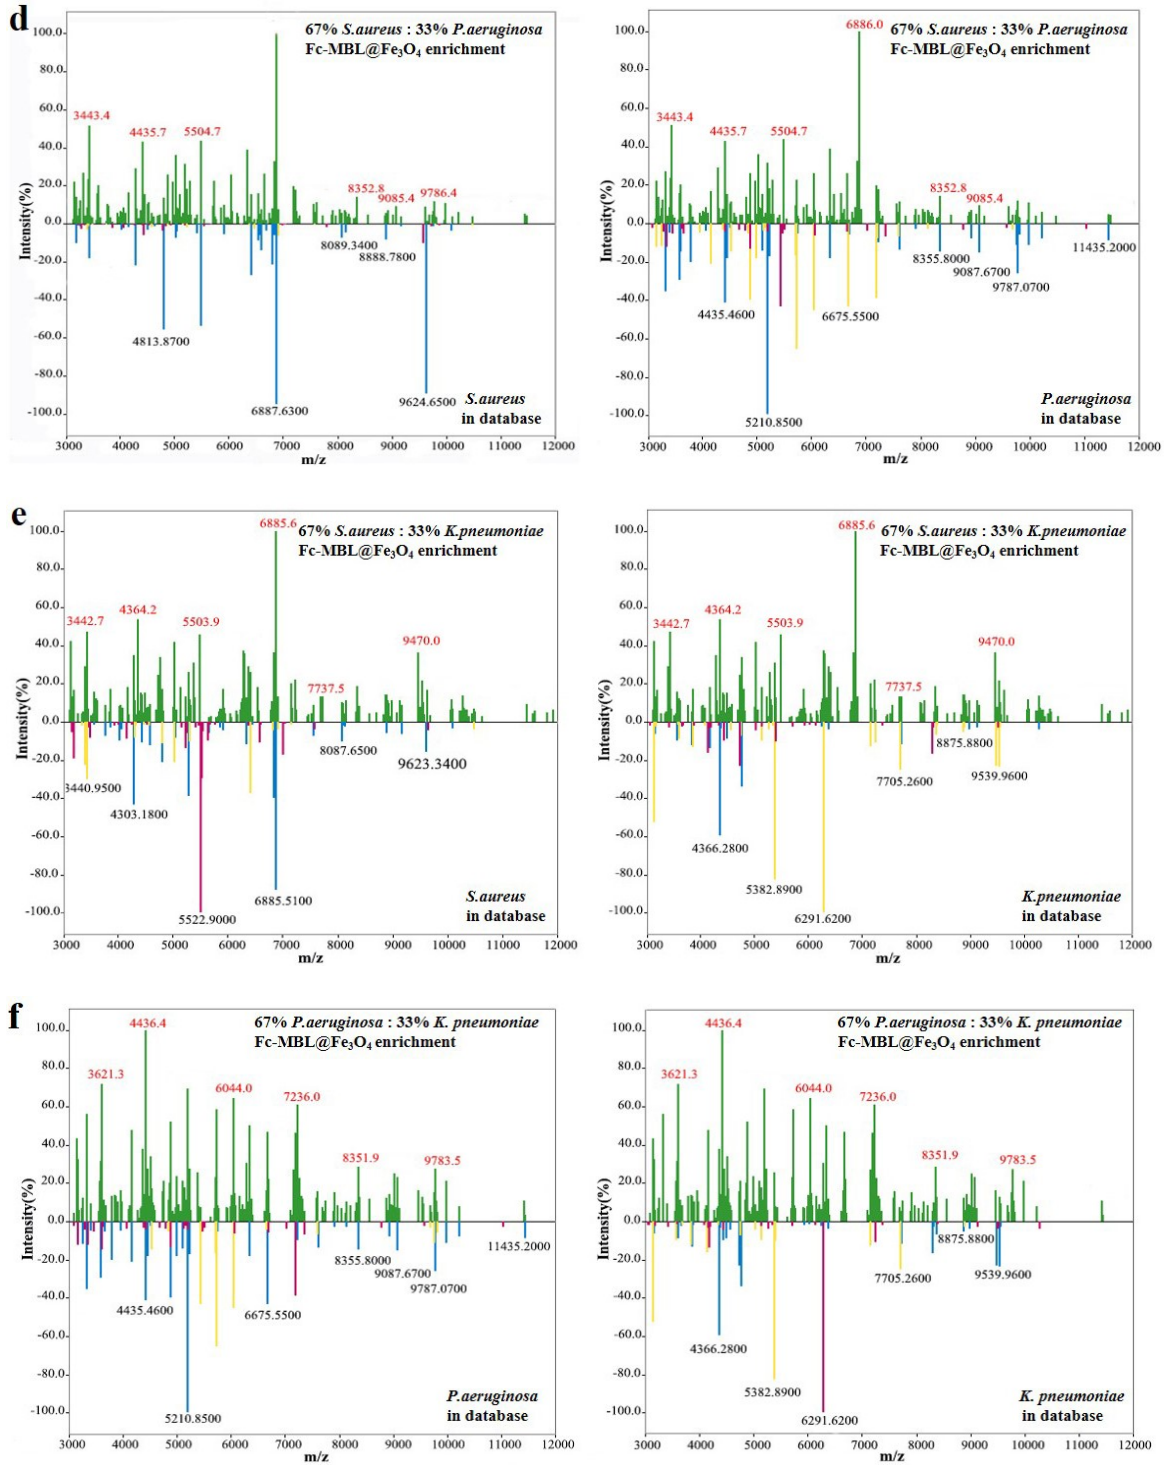

**Fig. S13.** MALDI-TOF MS of a bacterial mixture enriched by Fc-MBL@Fe<sub>3</sub>O<sub>4</sub> in urine. (a) 67% *E. coli* with 33% *S. aureus*, (b) 67% *E. coli* with 33% *P. aeruginosa*, (c) 67% *E. coli* with 33% *K. pneumoniae*, (d) 67% *S. aureus* with 33% *P. aeruginosa*, (e) 67% *S. aureus* with 33% *K. pneumoniae*, (f) 67% *P. aeruginosa* with 33% *K. pneumoniae*.

**Table S1.** Identification scores for bacterial mixtures in urine enriched by Fc-MBL@Fe<sub>3</sub>O<sub>4</sub>.

| Bacteria A / Bacteria B | Concentration ratio | Identification scores   |
|-------------------------|---------------------|-------------------------|
|                         |                     | Bacteria A / Bacteria B |
| Ec / Sa                 | 5/1                 | 1.96/-                  |
| Ec / PA                 | 5/1                 | 2.02/-                  |
| Ec / KP                 | 5/1                 | 1.94/-                  |
| Sa / PA                 | 5/1                 | 2.10/-                  |
| Sa / KP                 | 5/1                 | 2.05/-                  |
| PA/KP                   | 5/1                 | 2.17/-                  |
